# Supplementary material
Source: Research Square preprint supplement (doi:10.21203/rs.3.rs-10004993/v1)
Supplement: Supplementary file 1 [file 0534486b25302a07ec3301a3.docx]

APPENDIX TABLES

Appendix Table A1. Correlation Matrix with Significance Stars

| Variable | LCF | lnGDPPC | RENEW | FOSSIL | CREDIT | TRADE |
| --- | --- | --- | --- | --- | --- | --- |
| LCF | 1.0000 |  |  |  |  |  |
| lnGDPPC | -0.9507* | 1.0000 |  |  |  |  |
| RENEW | 0.8971* | -0.8207* | 1.0000 |  |  |  |
| FOSSIL | -0.8971* | 0.8207* | -1.0000* | 1.0000 |  |  |
| CREDIT | -0.9753* | 0.9232* | -0.8869* | 0.8869* | 1.0000 |  |
| TRADE | -0.7986* | 0.6872* | -0.7494* | 0.7494* | 0.8417* | 1.0000 |

Note. An asterisk indicates p < 0.01. All correlations are statistically significant at the 1 percent level.

Appendix Table A2. Cointegration Tests (Long Run Relationships)

| Test | Statistic | Critical value or p‑value | Decision |
| --- | --- | --- | --- |
| ARDL bounds F (fossil model with lnGDPPC) | 4.917 | I(1) 5% critical value = 4.386 | Cointegration (p = 0.029) |
| ARDL t‑statistic (fossil model with lnGDPPC) | -3.392 | I(1) 5% critical value = -4.207 | Weak evidence (p = 0.175) |
| Johansen trace (r = 0) | 167.74 | 5% critical value = 94.15 | At least one cointegrating vector |
| Johansen trace (r ≤ 1) | 104.05 | 5% critical value = 68.52 | At least two cointegrating vectors |
| Engle‑Granger Z(t) | -3.919 | 5% critical value = -5.059 | Weak evidence (small sample issue) |
| Error correction term (ECT) | -0.520 | p = 0.002 | Moderate adjustment (approximately 52 percent per year) |

*Notes. The ECT is from the fossil ARDL model with lnGDPPC. Critical values for the ARDL bounds test are from Pesaran, Shin & Smith (2001) Table CI(iii) Case III with k=5 (unrestricted intercept, no trend).

Appendix Table A3. Unit Root Tests (ADF, PP, DF‑GLS, Zivot‑Andrews)

| Variable | ADF (level) | PP (level) | DF‑GLS (level) | Z‑A break year | Z‑A t‑statistic | Classification |
| --- | --- | --- | --- | --- | --- | --- |
| LCF | -0.703 | -2.223 | -1.395 | 1995 | -2.695 | I(1) |
| lnGDPPC | -2.490 | -3.037 | -0.218 | 2006 | -3.092 | I(1) |
| RENEW | -0.892 | -4.020*** | -3.444 | 1986 | -5.720*** | I(0) |
| FOSSIL | -0.892 | -4.020*** | -3.444 | 1986 | -5.720*** | I(0) |
| CREDIT | -2.367 | -0.676 | -0.886 | 2016 | -2.459 | I(1) |
| TRADE | -1.950 | -1.695 | -1.600 | 2016 | -3.733 | I(1) |

*Significance. *** p<0.01, ** p<0.05, * p<0.10.*

Appendix Table A4. Fourier ARDL Results (k = 1)

| Variable | Coefficient | Std. Error | p‑value |
| --- | --- | --- | --- |
| ECT(‑1) | -0.682 | 0.150 | 0.000*** |
| sin1 | 0.0214 | 0.0189 | 0.263 |
| cos1 | 0.0077 | 0.0164 | 0.641 |
| Joint test (sin1 = cos1 = 0) | F = 0.75 | not applicable | 0.478 |
| Bounds F‑statistic | 5.356 | not applicable | 0.016** |

*Significance. *** p<0.01, ** p<0.05.*

Appendix Table A5. Robustness Checks (Full Specifications)

| Specification | ECT | lnGDPPC (LR) | lnGDPPC² (LR) | RENEW (LR) | CREDIT (LR) | Cointegration |
| --- | --- | --- | --- | --- | --- | --- |
| Baseline (core) | -0.629*** | -2.599*** | 0.181*** | 0.011 | -0.003 | Yes |
| Plus controls (urban and agriculture) | -0.698*** | -3.281*** | 0.228*** | 0.013 | -0.004* | Yes |
| BIC lags (maximum lag = 2) | -0.617*** | -0.551 | 0.039 | 0.039*** | -0.004* | Yes |
| Ecological footprint as dependent variable | -0.119 | 2.821 | -0.238 | 0.009 | 0.013 | No |
| Dynamic OLS (leads and lags = 1) | not applicable | -2.902*** | 0.192*** | 0.008 | 0.000 | Long run stable |

*Significance. *** p<0.01, ** p<0.05, * p<0.10.*

Appendix Table A6. ARIMA Forecast of LCF (2025-2050)

| Year | LCF forecast | Year | LCF forecast |
| --- | --- | --- | --- |
| 2025 | 0.329 | 2038 | 0.350 |
| 2026 | 0.331 | 2039 | 0.352 |
| 2027 | 0.332 | 2040 | 0.353 |
| 2028 | 0.334 | 2041 | 0.355 |
| 2029 | 0.336 | 2042 | 0.356 |
| 2030 | 0.337 | 2043 | 0.358 |
| 2031 | 0.339 | 2044 | 0.359 |
| 2032 | 0.341 | 2045 | 0.361 |
| 2033 | 0.342 | 2046 | 0.362 |
| 2034 | 0.344 | 2047 | 0.363 |
| 2035 | 0.345 | 2048 | 0.365 |
| 2036 | 0.347 | 2049 | 0.366 |
| 2037 | 0.349 | 2050 | 0.368 |

Notes. The ARIMA model is ARIMA(1,0,0). The estimated AR coefficient is 0.991.

Appendix Table A7. Residual Diagnostics (Detailed)

| Diagnostic | Test statistic | p‑value | Result |
| --- | --- | --- | --- |
| Normality (skewness) | χ² = 0.79 | 0.3725 | Normal |
| Normality (kurtosis) | χ² = 0.02 | 0.8806 | Normal |
| Normality (joint test) | adjusted χ² = 0.85 | 0.6543 | Normal |
| Serial correlation (Breusch‑Godfrey, lag 1) | χ² = 0.13 | 0.7190 | None |
| Serial correlation (Breusch‑Godfrey, lag 2) | χ² = 6.68 | 0.0354 | Mild autocorrelation |
| Heteroskedasticity (Breusch‑Pagan) | χ² = 0.00 | 0.9993 | None |
| Functional form (Ramsey RESET) | F = 0.28 | 0.8410 | Correctly specified |

Notes. Mild serial correlation at lag 2 is the only concern.

Appendix Table A8. Variance Inflation Factor (VIF)

| Variable | VIF | 1/VIF |
| --- | --- | --- |
| CREDIT | 25.01 | 0.040 |
| lnGDPPC | 10.28 | 0.097 |
| FOSSIL | 4.79 | 0.209 |
| TRADE | 4.78 | 0.209 |
| Mean VIF | 11.22 |  |

Notes. VIF values for CREDIT and lnGDPPC indicate multicollinearity.

Appendix Table A9. Post‑Estimation Diagnostics (ECM Model from Section 9)

| Test | Statistic | p‑value | Interpretation |
| --- | --- | --- | --- |
| Error correction term (ECT) | -0.629 (t = -4.67) | 0.000 | Strong adjustment toward equilibrium |
| Serial correlation (Breusch‑Godfrey, lag 2) | χ² = 6.68 | 0.035 | Mild autocorrelation present |
| Heteroskedasticity (Breusch‑Pagan) | χ² = 0.00 | 0.999 | No heteroskedasticity |
| Normality (skewness and kurtosis) | adjusted χ² = 0.85 | 0.654 | Residuals are normally distributed |
| Functional form (Ramsey RESET) | F = 0.28 | 0.841 | Model is correctly specified |
| Stability (CUSUM) | graphical | not applicable | Parameters are stable over time |

Appendix Table A10. Short run Baseline ARDL Results (Renewable versus Fossil Models)

| Component | Variable | Renewable Model | Fossil Model |
| --- | --- | --- | --- |
| Error correction | ECT(‑1) | -0.300 (p=0.160) | -0.520*** (p=0.002) |
| Short run | D(FOSSIL) | not included | 0.0135** (p=0.024) |
|  | LD(FOSSIL) | not included | 0.0109** (p=0.037) |
|  | D(RENEW) | -0.0142** (p=0.026) | not included |
|  | LD(RENEW) | -0.0119** (p=0.036) | not included |
|  | D(CREDIT) | -0.0039 (p=0.067) | -0.0020 (p=0.257) |
|  | LD(CREDIT) | -0.0047** (p=0.018) | -0.0037** (p=0.035) |
|  | D(TRADE) | 0.0025 (p=0.065) | 0.0009 (p=0.354) |
|  | LD(TRADE) | 0.0019* (p=0.052) | 0.0021** (p=0.017) |
| Bounds test | F‑statistic | 3.691 (p>0.10) | 4.917 |
|  | t‑statistic | -1.448 (p>0.10) | -3.392 |
| Model fit | Adjusted R² | 0.5955 | 0.5744 |

Appendix Table A11. Quantile ARDL (QARDL) Results – Short‑run Coefficients

| Variable | Q25 (τ=0.25) | Q50 (τ=0.50) | Q75 (τ=0.75) |
| --- | --- | --- | --- |
| L_ecm | -0.683*** (0.165) | -0.596*** (0.159) | -0.641*** (0.141) |
| d_lnGDPPC | -0.107 (1.298) | 0.808 (1.251) | 2.445** (1.106) |
| d_lnGDPPC² | 0.0131 (0.0942) | -0.0596 (0.0908) | -0.186** (0.0802) |
| d_RENEW | 0.00415 (0.00519) | -0.000591 (0.00500) | 0.00504 (0.00442) |
| d_CREDIT | -0.00162 (0.00215) | -0.00166 (0.00208) | -0.00209 (0.00183) |
| d_TRADE | -0.000582 (0.00101) | -0.00138 (0.000970) | -0.00177** (0.000857) |
| Constant | -0.0205*** (0.00591) | -0.00793 (0.00569) | 0.00673 (0.00503) |
| Observations | 49 | 49 | 49 |
| Pseudo R² | 0.3016 | 0.2834 | 0.3231 |

*Notes. *** p<0.01, ** p<0.05, * p<0.10.

Appendix Table A12. NARDL Asymmetry Results for Fossil Fuels and Renewable Energy

| Variable pair | Wald test F‑statistic | p‑value | Conclusion |
| --- | --- | --- | --- |
| FOSSIL_pos vs FOSSIL_neg | 2.72 | 0.109 | Symmetry not rejected |
| RENEW_pos vs RENEW_neg | 2.72 | 0.109 | Symmetry not rejected |
| CREDIT_pos vs CREDIT_neg | 1.88 | 0.181 | Symmetry not rejected |

*Notes: Wald test of long‑run symmetry (β⁺ = β⁻). None reject symmetry at p < 0.10.*
